# Supplementary material for: Molecular Identification of Human Adenovirus Isolated from Different Wastewater Treatment Plants in Riyadh, Saudi Arabia: Surveillance and Meteorological Impacts
Source: MDPI journal article supplement (doi:10.3390/w15071367), 2023-04-02
Supplement: s1 [file s1]

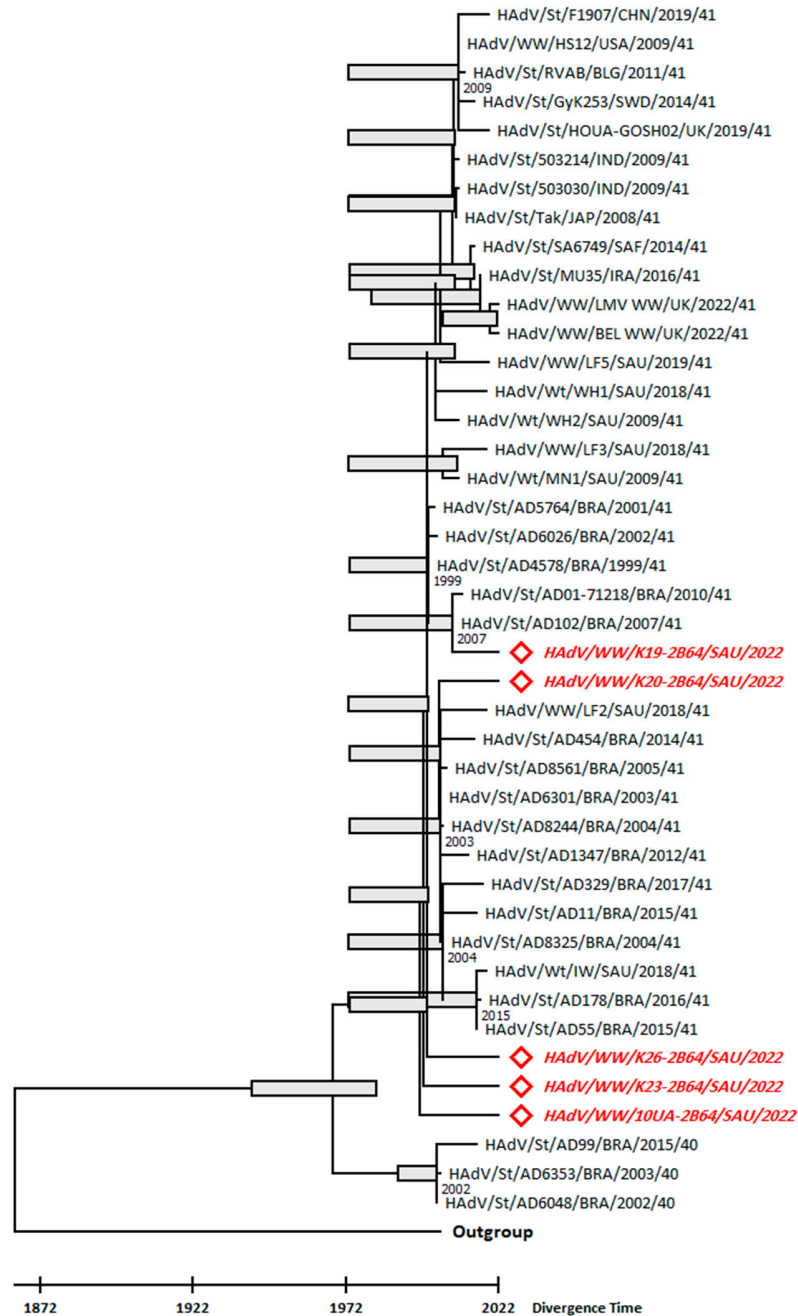

**Figure S1.** Timetree for HAdV evolutionary analysis by Maximum Likelihood method. The log likelihood value of the topology is -742.94. The tree is drawn to scale, with branch lengths measured in the relative number of substitutions per site with node height error bar. The red italicized sequences are our HAdV sequences recovered from raw water samples.

Table S1. Maximum Likelihood fits of 24 different nucleotide substitution models

| Model    | #Param | BIC*    | AICc    | InL         | Invariant | Gamma  | R      | Freq<br>A | Freq<br>T | Freq<br>C | Freq<br>G | A=>T | A=>C | A=>G | T=>A | T=>C | T=>G | C=>A | C=>T | C=>G | G=>A | G=>T | G=>C |
|----------|--------|---------|---------|-------------|-----------|--------|--------|-----------|-----------|-----------|-----------|------|------|------|------|------|------|------|------|------|------|------|------|
| T92      | 85     | 2286.21 | 1664.90 | -<br>746.79 | n/a       | n/a    | 0.9483 | 0.2025    | 0.2025    | 0.2975    | 0.2975    | 0.05 | 0.07 | 0.15 | 0.05 | 0.15 | 0.07 | 0.05 | 0.1  | 0.07 | 0.1  | 0.05 | 0.07 |
| T92+G    | 86     | 2288.15 | 1659.54 | -<br>743.10 | n/a       | 0.6221 | 0.9592 | 0.2025    | 0.2025    | 0.2975    | 0.2975    | 0.05 | 0.07 | 0.15 | 0.05 | 0.15 | 0.07 | 0.05 | 0.1  | 0.07 | 0.1  | 0.05 | 0.07 |
| T92+I    | 86     | 2288.35 | 1659.74 | -<br>743.20 | 0.5027    | n/a    | 0.9516 | 0.2025    | 0.2025    | 0.2975    | 0.2975    | 0.05 | 0.07 | 0.15 | 0.05 | 0.15 | 0.07 | 0.05 | 0.1  | 0.07 | 0.1  | 0.05 | 0.07 |
| JC       | 83     | 2290.72 | 1684.00 | -<br>758.37 | n/a       | n/a    | 0.5000 | 0.25      | 0.25      | 0.25      | 0.25      | 0.08 | 0.08 | 0.08 | 0.08 | 0.08 | 0.08 | 0.08 | 0.08 | 0.08 | 0.08 | 0.08 | 0.08 |
| JC+G     | 84     | 2291.94 | 1677.92 | -<br>754.32 | n/a       | 0.5723 | 0.5000 | 0.25      | 0.25      | 0.25      | 0.25      | 0.08 | 0.08 | 0.08 | 0.08 | 0.08 | 0.08 | 0.08 | 0.08 | 0.08 | 0.08 | 0.08 | 0.08 |
| JC+I     | 84     | 2293.08 | 1679.06 | -<br>754.89 | 0.3908    | n/a    | 0.5000 | 0.25      | 0.25      | 0.25      | 0.25      | 0.08 | 0.08 | 0.08 | 0.08 | 0.08 | 0.08 | 0.08 | 0.08 | 0.08 | 0.08 | 0.08 | 0.08 |
| K2       | 84     | 2293.80 | 1679.79 | -<br>755.25 | n/a       | n/a    | 0.9412 | 0.25      | 0.25      | 0.25      | 0.25      | 0.06 | 0.06 | 0.12 | 0.06 | 0.12 | 0.06 | 0.06 | 0.12 | 0.06 | 0.12 | 0.06 | 0.06 |
| K2+G     | 85     | 2295.21 | 1673.90 | -<br>751.29 | n/a       | 0.5873 | 0.9585 | 0.25      | 0.25      | 0.25      | 0.25      | 0.06 | 0.06 | 0.12 | 0.06 | 0.12 | 0.06 | 0.06 | 0.12 | 0.06 | 0.12 | 0.06 | 0.06 |
| K2+I     | 85     | 2296.38 | 1675.07 | -<br>751.88 | 0.3908    | n/a    | 0.9471 | 0.25      | 0.25      | 0.25      | 0.25      | 0.06 | 0.06 | 0.12 | 0.06 | 0.12 | 0.06 | 0.06 | 0.12 | 0.06 | 0.12 | 0.06 | 0.06 |
| T92+G+I  | 87     | 2297.64 | 1661.74 | -<br>743.18 | 0.0112    | 0.6404 | 0.9592 | 0.2025    | 0.2025    | 0.2975    | 0.2975    | 0.05 | 0.07 | 0.15 | 0.05 | 0.15 | 0.07 | 0.05 | 0.1  | 0.07 | 0.1  | 0.05 | 0.07 |
| JC+G+I   | 85     | 2301.34 | 1680.03 | -<br>754.36 | 0.1292    | 0.7870 | 0.5000 | 0.25      | 0.25      | 0.25      | 0.25      | 0.08 | 0.08 | 0.08 | 0.08 | 0.08 | 0.08 | 0.08 | 0.08 | 0.08 | 0.08 | 0.08 | 0.08 |
| HKY      | 87     | 2301.69 | 1665.79 | -<br>745.21 | n/a       | n/a    | 0.9487 | 0.2153    | 0.1897    | 0.3339    | 0.2611    | 0.05 | 0.08 | 0.13 | 0.05 | 0.17 | 0.07 | 0.05 | 0.09 | 0.07 | 0.11 | 0.05 | 0.08 |
| HKY+G    | 88     | 2303.90 | 1660.71 | -<br>741.65 | n/a       | 0.6415 | 0.9529 | 0.2153    | 0.1897    | 0.3339    | 0.2611    | 0.05 | 0.08 | 0.13 | 0.05 | 0.17 | 0.07 | 0.05 | 0.09 | 0.07 | 0.11 | 0.05 | 0.08 |
| HKY+I    | 88     | 2303.96 | 1660.77 | -<br>741.68 | 0.4971    | n/a    | 0.9460 | 0.2153    | 0.1897    | 0.3339    | 0.2611    | 0.05 | 0.08 | 0.13 | 0.05 | 0.17 | 0.07 | 0.05 | 0.09 | 0.07 | 0.11 | 0.05 | 0.08 |
| K2+G+I   | 86     | 2304.57 | 1675.97 | -<br>751.31 | 0.0106    | 0.6033 | 0.9584 | 0.25      | 0.25      | 0.25      | 0.25      | 0.06 | 0.06 | 0.12 | 0.06 | 0.12 | 0.06 | 0.06 | 0.12 | 0.06 | 0.12 | 0.06 | 0.06 |
| TN93     | 88     | 2309.58 | 1666.39 | -<br>744.49 | n/a       | n/a    | 0.9435 | 0.2153    | 0.1897    | 0.3339    | 0.2611    | 0.05 | 0.08 | 0.1  | 0.05 | 0.2  | 0.07 | 0.05 | 0.11 | 0.07 | 0.08 | 0.05 | 0.08 |
| TN93+G   | 89     | 2312.14 | 1661.66 | -<br>741.11 | n/a       | 0.6673 | 0.9485 | 0.2153    | 0.1897    | 0.3339    | 0.2611    | 0.05 | 0.08 | 0.1  | 0.05 | 0.2  | 0.07 | 0.05 | 0.11 | 0.07 | 0.08 | 0.05 | 0.08 |
| TN93+I   | 89     | 2312.24 | 1661.76 | -<br>741.16 | 0.4879    | n/a    | 0.9410 | 0.2153    | 0.1897    | 0.3339    | 0.2611    | 0.05 | 0.08 | 0.1  | 0.05 | 0.2  | 0.07 | 0.05 | 0.11 | 0.07 | 0.08 | 0.05 | 0.08 |
| HKY+G+I  | 89     | 2313.33 | 1662.85 | -<br>741.70 | 0.0649    | 0.7511 | 0.9528 | 0.2153    | 0.1897    | 0.3339    | 0.2611    | 0.05 | 0.08 | 0.13 | 0.05 | 0.17 | 0.07 | 0.05 | 0.09 | 0.07 | 0.11 | 0.05 | 0.08 |
| TN93+G+I | 90     | 2321.64 | 1663.86 | -<br>741.19 | 0         | 0.6677 | 0.9484 | 0.2153    | 0.1897    | 0.3339    | 0.2611    | 0.05 | 0.08 | 0.1  | 0.05 | 0.2  | 0.07 | 0.05 | 0.11 | 0.07 | 0.08 | 0.05 | 0.08 |
| GTR      | 91     | 2333.87 | 1668.80 | -<br>742.65 | n/a       | n/a    | 0.9470 | 0.2153    | 0.1897    | 0.3339    | 0.2611    | 0.03 | 0.07 | 0.1  | 0.04 | 0.2  | 0.11 | 0.05 | 0.11 | 0.05 | 0.08 | 0.08 | 0.07 |
| GTR+G    | 92     | 2336.84 | 1664.48 | -<br>739.47 | n/a       | 0.7032 | 0.9563 | 0.2153    | 0.1897    | 0.3339    | 0.2611    | 0.03 | 0.08 | 0.1  | 0.04 | 0.2  | 0.11 | 0.05 | 0.11 | 0.05 | 0.08 | 0.08 | 0.07 |
| GTR+I    | 92     | 2336.96 | 1664.60 | -<br>739.53 | 0.4771    | n/a    | 0.9489 | 0.2153    | 0.1897    | 0.3339    | 0.2611    | 0.03 | 0.07 | 0.1  | 0.04 | 0.2  | 0.11 | 0.05 | 0.11 | 0.05 | 0.08 | 0.08 | 0.07 |
| GTR+G+I  | 93     | 2346.15 | 1666.50 | -<br>739.46 | 0.4211    | 6.1806 | 0.9521 | 0.2153    | 0.1897    | 0.3339    | 0.2611    | 0.03 | 0.07 | 0.1  | 0.04 | 0.2  | 0.11 | 0.05 | 0.11 | 0.05 | 0.08 | 0.08 | 0.07 |

\*Models with the lowest BIC scores (Bayesian Information Criterion) are considered to describe the substitution pattern the best (written in red and bold). For each model, AICc value (Akaike Information Criterion, corrected), Maximum Likelihood value (lnL), and the number of parameters (including branch lengths) are also depicted above. 5 rate categories-discrete Gamma distribution (+*G*) was applied for modeling the evolutionary rates non-uniformity among sites and supposing that a certain fraction of sites is evolutionarily invariable (+*I*). Proposed or estimated values of transition/transversion bias (R) for each model are displayed. They are followed by nucleotide frequencies (f) and rates of base substitutions (r) for each nucleotide pair. A total of 261 positions existed in the final dataset. Abbreviations: TR: General Time Reversible; HKY: Hasegawa-Kishino-Yano; TN93: Tamura-Nei; T92: Tamura 3-parameter; K2: Kimura 2-parameter; JC: Jukes-Cantor.

Table S2. Estimates of evolutionary divergence between HAdV sequences recovered from WWTPs' raw water in Riyadh, Saudi Arabia.

| Species 1                    | Species 2                    | Dist                |
|------------------------------|------------------------------|---------------------|
| <b>HAdV/WW/K20-2B64/2022</b> | <b>HAdV/WW/K22-2B64/2022</b> | <b>0.0000000000</b> |
| <b>HAdV/WW/K20-2B64/2022</b> | <b>HAdV/WW/K24-2B64/2022</b> | <b>0.0000000000</b> |
| <b>HAdV/WW/K20-2B64/2022</b> | <b>HAdV/WW/K25-2B64/2022</b> | <b>0.0000000000</b> |
| <b>HAdV/WW/K20-2B64/2022</b> | <b>HAdV/WW/7EA-2B64/2022</b> | <b>0.0000000000</b> |
| HAdV/WW/K19-2B64/2022        | HAdV/WW/K20-2B64/2022        | 0.0038947342        |
| HAdV/WW/K19-2B64/2022        | HAdV/WW/K22-2B64/2022        | 0.0038947342        |
| HAdV/WW/K19-2B64/2022        | HAdV/WW/K24-2B64/2022        | 0.0038947342        |
| HAdV/WW/K19-2B64/2022        | HAdV/WW/K25-2B64/2022        | 0.0038947342        |
| HAdV/WW/K19-2B64/2022        | HAdV/WW/7EA-2B64/2022        | 0.0038947342        |
| HAdV/WW/K20-2B64/2022        | HAdV/WW/10UA-2B64/2022       | 0.0077749714        |
| HAdV/WW/K20-2B64/2022        | HAdV/WW/K26-2B64/2022        | 0.0077801023        |
| HAdV/WW/K26-2B64/2022        | HAdV/WW/7EA-2B64/2022        | 0.0077801023        |
| HAdV/WW/K19-2B64/2022        | HAdV/WW/10UA-2B64/2022       | 0.0117020094        |
| HAdV/WW/K19-2B64/2022        | HAdV/WW/K26-2B64/2022        | 0.0118377479        |
| HAdV/WW/K26-2B64/2022        | HAdV/WW/10UA-2B64/2022       | 0.0156630356        |
| HAdV/WW/K23-2B64/2022        | HAdV/WW/10UA-2B64/2022       | 0.0197033923        |
| HAdV/WW/K20-2B64/2022        | HAdV/WW/K23-2B64/2022        | 0.0197356644        |
| HAdV/WW/K23-2B64/2022        | HAdV/WW/K24-2B64/2022        | 0.0197356644        |
| HAdV/WW/K23-2B64/2022        | HAdV/WW/K25-2B64/2022        | 0.0197356644        |
| HAdV/WW/K23-2B64/2022        | HAdV/WW/7EA-2B64/2022        | 0.0197356644        |
| HAdV/WW/K19-2B64/2022        | HAdV/WW/K23-2B64/2022        | 0.0237926548        |
| HAdV/WW/K23-2B64/2022        | HAdV/WW/K26-2B64/2022        | 0.0238755964        |

The number of base substitutions per site from between sequences are shown. Analyses were conducted using the Tamura-3 parameter. The rate variation among sites was modeled with a gamma distribution (shape parameter = 1). This analysis involved 9 nucleotide sequences. Codon positions included were 1st+2nd+3rd+Noncoding. All ambiguous positions were removed for each sequence pair (pairwise deletion option). There were a total of 261 positions in the final dataset. Red bold sequences refer to same sequence identity with null evolutionary distance ( $d = 0.0000$ ).

Table S3. Evolutionary divergence estimates between human Adenovirus sequences.

| Species 1                      | Species 2                 | Dist       |
|--------------------------------|---------------------------|------------|
| HAdV/St/AD5764/BRA/2001/41     | HAdV/WW/K19-2B64/SAU/2022 | 0.00000000 |
| HAdV/St/AD6026/BRA/2002/41     | HAdV/WW/K19-2B64/SAU/2022 | 0.00000000 |
| HAdV/St/AD4578/BRA/1999/41     | HAdV/WW/K19-2B64/SAU/2022 | 0.00000000 |
| HAdV/St/AD01-71218/BRA/2010/41 | HAdV/WW/K19-2B64/SAU/2022 | 0.00000000 |
| HAdV/St/AD102/BRA/2007/41      | HAdV/WW/K19-2B64/SAU/2022 | 0.00000000 |
| HAdV/St/AD329/BRA/2017/41      | HAdV/WW/K20-2B64/SAU/2022 | 0.00000000 |
| HAdV/St/AD11/BRA/2015/41       | HAdV/WW/K20-2B64/SAU/2022 | 0.00000000 |
| HAdV/St/AD8325/BRA/2004/41     | HAdV/WW/K20-2B64/SAU/2022 | 0.00000000 |
| HAdV/Wt/IW/SAU/2018/41         | HAdV/WW/K20-2B64/SAU/2022 | 0.00000000 |
| HAdV/St/AD178/BRA/2016/41      | HAdV/WW/K20-2B64/SAU/2022 | 0.00000000 |
| HAdV/St/AD55/BRA/2015/41       | HAdV/WW/K20-2B64/SAU/2022 | 0.00000000 |
| HAdV/St/AD1347/BRA/2012/41     | HAdV/WW/K20-2B64/SAU/2022 | 0.00000000 |
| HAdV/St/AD8244/BRA/2004/41     | HAdV/WW/K20-2B64/SAU/2022 | 0.00000000 |
| HAdV/St/AD8561/BRA/2005/41     | HAdV/WW/K20-2B64/SAU/2022 | 0.00000000 |
| HAdV/St/AD6301/BRA/2003/41     | HAdV/WW/K20-2B64/SAU/2022 | 0.00000000 |
| HAdV/WW/LF2/SAU/2018/41        | HAdV/WW/K20-2B64/SAU/2022 | 0.00384260 |
| HAdV/Wt/WH1/SAU/2018/41        | HAdV/WW/K20-2B64/SAU/2022 | 0.00384260 |
| HAdV/St/AD329/BRA/2017/41      | HAdV/WW/K19-2B64/SAU/2022 | 0.00384669 |
| HAdV/St/AD11/BRA/2015/41       | HAdV/WW/K19-2B64/SAU/2022 | 0.00384669 |
| HAdV/St/AD8325/BRA/2004/41     | HAdV/WW/K19-2B64/SAU/2022 | 0.00384669 |
| HAdV/Wt/IW/SAU/2018/41         | HAdV/WW/K19-2B64/SAU/2022 | 0.00384669 |
| HAdV/St/AD178/BRA/2016/41      | HAdV/WW/K19-2B64/SAU/2022 | 0.00384669 |
| HAdV/St/AD55/BRA/2015/41       | HAdV/WW/K19-2B64/SAU/2022 | 0.00384669 |
| HAdV/St/AD1347/BRA/2012/41     | HAdV/WW/K19-2B64/SAU/2022 | 0.00384669 |
| HAdV/St/AD8244/BRA/2004/41     | HAdV/WW/K19-2B64/SAU/2022 | 0.00384669 |
| HAdV/St/AD8561/BRA/2005/41     | HAdV/WW/K19-2B64/SAU/2022 | 0.00384669 |
| HAdV/St/AD6301/BRA/2003/41     | HAdV/WW/K19-2B64/SAU/2022 | 0.00384669 |
| HAdV/St/AD5764/BRA/2001/41     | HAdV/WW/K20-2B64/SAU/2022 | 0.00384669 |
| HAdV/St/AD6026/BRA/2002/41     | HAdV/WW/K20-2B64/SAU/2022 | 0.00384669 |
| HAdV/St/AD4578/BRA/1999/41     | HAdV/WW/K20-2B64/SAU/2022 | 0.00384669 |
| HAdV/St/AD01-71218/BRA/2010/41 | HAdV/WW/K20-2B64/SAU/2022 | 0.00384669 |
| HAdV/St/AD102/BRA/2007/41      | HAdV/WW/K20-2B64/SAU/2022 | 0.00384669 |
| HAdV/St/AD454/BRA/2014/41      | HAdV/WW/K20-2B64/SAU/2022 | 0.00384669 |
| HAdV/WW/K19-2B64/SAU/2022      | HAdV/WW/K20-2B64/SAU/2022 | 0.00384669 |
| HAdV/WW/LF2/SAU/2018/41        | HAdV/WW/K19-2B64/SAU/2022 | 0.00770415 |
| HAdV/Wt/WH1/SAU/2018/41        | HAdV/WW/K19-2B64/SAU/2022 | 0.00770415 |
| HAdV/St/AD329/BRA/2017/41      | HAdV/WW/K26-2B64/SAU/2022 | 0.00770415 |
| HAdV/St/AD11/BRA/2015/41       | HAdV/WW/K26-2B64/SAU/2022 | 0.00770415 |
| HAdV/St/AD8325/BRA/2004/41     | HAdV/WW/K26-2B64/SAU/2022 | 0.00770415 |
| HAdV/Wt/IW/SAU/2018/41         | HAdV/WW/K26-2B64/SAU/2022 | 0.00770415 |
| HAdV/St/AD178/BRA/2016/41      | HAdV/WW/K26-2B64/SAU/2022 | 0.00770415 |
| HAdV/St/AD55/BRA/2015/41       | HAdV/WW/K26-2B64/SAU/2022 | 0.00770415 |
| HAdV/St/AD1347/BRA/2012/41     | HAdV/WW/K26-2B64/SAU/2022 | 0.00770415 |
| HAdV/St/AD8244/BRA/2004/41     | HAdV/WW/K26-2B64/SAU/2022 | 0.00770415 |
| HAdV/St/AD8561/BRA/2005/41     | HAdV/WW/K26-2B64/SAU/2022 | 0.00770415 |
| HAdV/St/AD6301/BRA/2003/41     | HAdV/WW/K26-2B64/SAU/2022 | 0.00770415 |

|                                |                            |            |
|--------------------------------|----------------------------|------------|
| HAdV/WW/K20-2B64/SAU/2022      | HAdV/WW/K26-2B64/SAU/2022  | 0.00770415 |
| HAdV/St/AD329/BRA/2017/41      | HAdV/WW/10UA-2B64/SAU/2022 | 0.00770417 |
| HAdV/St/AD11/BRA/2015/41       | HAdV/WW/10UA-2B64/SAU/2022 | 0.00770417 |
| HAdV/St/AD8325/BRA/2004/41     | HAdV/WW/10UA-2B64/SAU/2022 | 0.00770417 |
| HAdV/Wt/IW/SAU/2018/41         | HAdV/WW/10UA-2B64/SAU/2022 | 0.00770417 |
| HAdV/St/AD178/BRA/2016/41      | HAdV/WW/10UA-2B64/SAU/2022 | 0.00770417 |
| HAdV/St/AD55/BRA/2015/41       | HAdV/WW/10UA-2B64/SAU/2022 | 0.00770417 |
| HAdV/St/AD1347/BRA/2012/41     | HAdV/WW/10UA-2B64/SAU/2022 | 0.00770417 |
| HAdV/St/AD8244/BRA/2004/41     | HAdV/WW/10UA-2B64/SAU/2022 | 0.00770417 |
| HAdV/St/AD8561/BRA/2005/41     | HAdV/WW/10UA-2B64/SAU/2022 | 0.00770417 |
| HAdV/St/AD6301/BRA/2003/41     | HAdV/WW/10UA-2B64/SAU/2022 | 0.00770417 |
| HAdV/WW/K20-2B64/SAU/2022      | HAdV/WW/10UA-2B64/SAU/2022 | 0.00770417 |
| HAdV/WW/LF3/SAU/2018/41        | HAdV/WW/K20-2B64/SAU/2022  | 0.00770780 |
| HAdV/St/AD454/BRA/2014/41      | HAdV/WW/K19-2B64/SAU/2022  | 0.00772417 |
| HAdV/St/MU35/IRA/2016/41       | HAdV/WW/K19-2B64/SAU/2022  | 0.01158423 |
| HAdV/WW/BEL WW/UK/2022/41      | HAdV/WW/K19-2B64/SAU/2022  | 0.01158423 |
| HAdV/WW/LF2/SAU/2018/41        | HAdV/WW/K26-2B64/SAU/2022  | 0.01158427 |
| HAdV/Wt/WH1/SAU/2018/41        | HAdV/WW/K26-2B64/SAU/2022  | 0.01158427 |
| HAdV/WW/LF3/SAU/2018/41        | HAdV/WW/K19-2B64/SAU/2022  | 0.01158432 |
| HAdV/St/HOUA-GOSH02/UK/2019/41 | HAdV/WW/K20-2B64/SAU/2022  | 0.01158432 |
| HAdV/St/GyK253/SWD/2014/41     | HAdV/WW/K20-2B64/SAU/2022  | 0.01158432 |
| HAdV/St/RVAB/BLG/2011/41       | HAdV/WW/K20-2B64/SAU/2022  | 0.01158432 |
| HAdV/St/F1907/CHN/2019/41      | HAdV/WW/K20-2B64/SAU/2022  | 0.01158432 |
| HAdV/WW/HS12/USA/2009/41       | HAdV/WW/K20-2B64/SAU/2022  | 0.01158432 |
| HAdV/St/503214/IND/2009/41     | HAdV/WW/K20-2B64/SAU/2022  | 0.01158432 |
| HAdV/WW/LF2/SAU/2018/41        | HAdV/WW/10UA-2B64/SAU/2022 | 0.01158432 |
| HAdV/Wt/WH1/SAU/2018/41        | HAdV/WW/10UA-2B64/SAU/2022 | 0.01158432 |
| HAdV/St/AD5764/BRA/2001/41     | HAdV/WW/K26-2B64/SAU/2022  | 0.01159671 |
| HAdV/St/AD6026/BRA/2002/41     | HAdV/WW/K26-2B64/SAU/2022  | 0.01159671 |
| HAdV/St/AD4578/BRA/1999/41     | HAdV/WW/K26-2B64/SAU/2022  | 0.01159671 |
| HAdV/St/AD01-71218/BRA/2010/41 | HAdV/WW/K26-2B64/SAU/2022  | 0.01159671 |
| HAdV/St/AD102/BRA/2007/41      | HAdV/WW/K26-2B64/SAU/2022  | 0.01159671 |
| HAdV/St/AD454/BRA/2014/41      | HAdV/WW/K26-2B64/SAU/2022  | 0.01159671 |
| HAdV/WW/K19-2B64/SAU/2022      | HAdV/WW/K26-2B64/SAU/2022  | 0.01159671 |
| HAdV/St/AD5764/BRA/2001/41     | HAdV/WW/10UA-2B64/SAU/2022 | 0.01159681 |
| HAdV/St/AD6026/BRA/2002/41     | HAdV/WW/10UA-2B64/SAU/2022 | 0.01159681 |
| HAdV/St/AD4578/BRA/1999/41     | HAdV/WW/10UA-2B64/SAU/2022 | 0.01159681 |
| HAdV/St/AD01-71218/BRA/2010/41 | HAdV/WW/10UA-2B64/SAU/2022 | 0.01159681 |
| HAdV/St/AD102/BRA/2007/41      | HAdV/WW/10UA-2B64/SAU/2022 | 0.01159681 |
| HAdV/St/AD454/BRA/2014/41      | HAdV/WW/10UA-2B64/SAU/2022 | 0.01159681 |
| HAdV/WW/K19-2B64/SAU/2022      | HAdV/WW/10UA-2B64/SAU/2022 | 0.01159681 |
| HAdV/WW/LMV WW/UK/2022/41      | HAdV/WW/K19-2B64/SAU/2022  | 0.01195329 |
| HAdV/St/SA6749/SAF/2014/41     | HAdV/WW/K19-2B64/SAU/2022  | 0.01548723 |
| HAdV/WW/LF3/SAU/2018/41        | HAdV/WW/K26-2B64/SAU/2022  | 0.01548744 |
| HAdV/WW/LF3/SAU/2018/41        | HAdV/WW/10UA-2B64/SAU/2022 | 0.01548752 |
| HAdV/St/HOUA-GOSH02/UK/2019/41 | HAdV/WW/K19-2B64/SAU/2022  | 0.01549215 |
| HAdV/St/GyK253/SWD/2014/41     | HAdV/WW/K19-2B64/SAU/2022  | 0.01549215 |
| HAdV/St/RVAB/BLG/2011/41       | HAdV/WW/K19-2B64/SAU/2022  | 0.01549215 |

|                                |                            |            |
|--------------------------------|----------------------------|------------|
| HAdV/St/F1907/CHN/2019/41      | HAdV/WW/K19-2B64/SAU/2022  | 0.01549215 |
| HAdV/WW/HS12/USA/2009/41       | HAdV/WW/K19-2B64/SAU/2022  | 0.01549215 |
| HAdV/St/503214/IND/2009/41     | HAdV/WW/K19-2B64/SAU/2022  | 0.01549215 |
| HAdV/St/MU35/IRA/2016/41       | HAdV/WW/K20-2B64/SAU/2022  | 0.01549215 |
| HAdV/WW/BEL WW/UK/2022/41      | HAdV/WW/K20-2B64/SAU/2022  | 0.01549215 |
| HAdV/St/503030/IND/2009/41     | HAdV/WW/K20-2B64/SAU/2022  | 0.01549215 |
| HAdV/St/Tak/JAP/2008/41        | HAdV/WW/K20-2B64/SAU/2022  | 0.01549215 |
| HAdV/WW/K26-2B64/SAU/2022      | HAdV/WW/10UA-2B64/SAU/2022 | 0.01549215 |
| HAdV/Wt/WH2/SAU/2009/41        | HAdV/WW/K20-2B64/SAU/2022  | 0.01550720 |
| HAdV/WW/LMV WW/UK/2022/41      | HAdV/WW/K20-2B64/SAU/2022  | 0.01598700 |
| HAdV/St/SA6749/SAF/2014/41     | HAdV/WW/K20-2B64/SAU/2022  | 0.01941044 |
| HAdV/St/HOUA-GOSH02/UK/2019/41 | HAdV/WW/K26-2B64/SAU/2022  | 0.01941058 |
| HAdV/St/GyK253/SWD/2014/41     | HAdV/WW/K26-2B64/SAU/2022  | 0.01941058 |
| HAdV/St/RVAB/BLG/2011/41       | HAdV/WW/K26-2B64/SAU/2022  | 0.01941058 |
| HAdV/St/F1907/CHN/2019/41      | HAdV/WW/K26-2B64/SAU/2022  | 0.01941058 |
| HAdV/WW/HS12/USA/2009/41       | HAdV/WW/K26-2B64/SAU/2022  | 0.01941058 |
| HAdV/St/503214/IND/2009/41     | HAdV/WW/K26-2B64/SAU/2022  | 0.01941058 |
| HAdV/St/HOUA-GOSH02/UK/2019/41 | HAdV/WW/10UA-2B64/SAU/2022 | 0.01941072 |
| HAdV/St/GyK253/SWD/2014/41     | HAdV/WW/10UA-2B64/SAU/2022 | 0.01941072 |
| HAdV/St/RVAB/BLG/2011/41       | HAdV/WW/10UA-2B64/SAU/2022 | 0.01941072 |
| HAdV/St/F1907/CHN/2019/41      | HAdV/WW/10UA-2B64/SAU/2022 | 0.01941072 |
| HAdV/WW/HS12/USA/2009/41       | HAdV/WW/10UA-2B64/SAU/2022 | 0.01941072 |
| HAdV/St/503214/IND/2009/41     | HAdV/WW/10UA-2B64/SAU/2022 | 0.01941072 |
| HAdV/Wt/WH2/SAU/2009/41        | HAdV/WW/K19-2B64/SAU/2022  | 0.01941397 |
| HAdV/WW/K23-2B64/SAU/2022      | HAdV/WW/10UA-2B64/SAU/2022 | 0.01941397 |
| HAdV/St/503030/IND/2009/41     | HAdV/WW/K19-2B64/SAU/2022  | 0.01943166 |
| HAdV/St/Tak/JAP/2008/41        | HAdV/WW/K19-2B64/SAU/2022  | 0.01943166 |
| HAdV/St/AD329/BRA/2017/41      | HAdV/WW/K23-2B64/SAU/2022  | 0.01944185 |
| HAdV/St/AD11/BRA/2015/41       | HAdV/WW/K23-2B64/SAU/2022  | 0.01944185 |
| HAdV/St/AD8325/BRA/2004/41     | HAdV/WW/K23-2B64/SAU/2022  | 0.01944185 |
| HAdV/Wt/IW/SAU/2018/41         | HAdV/WW/K23-2B64/SAU/2022  | 0.01944185 |
| HAdV/St/AD178/BRA/2016/41      | HAdV/WW/K23-2B64/SAU/2022  | 0.01944185 |
| HAdV/St/AD55/BRA/2015/41       | HAdV/WW/K23-2B64/SAU/2022  | 0.01944185 |
| HAdV/St/AD1347/BRA/2012/41     | HAdV/WW/K23-2B64/SAU/2022  | 0.01944185 |
| HAdV/St/AD8244/BRA/2004/41     | HAdV/WW/K23-2B64/SAU/2022  | 0.01944185 |
| HAdV/St/AD8561/BRA/2005/41     | HAdV/WW/K23-2B64/SAU/2022  | 0.01944185 |
| HAdV/St/AD6301/BRA/2003/41     | HAdV/WW/K23-2B64/SAU/2022  | 0.01944185 |
| HAdV/WW/K20-2B64/SAU/2022      | HAdV/WW/K23-2B64/SAU/2022  | 0.01944185 |
| HAdV/WW/K23-2B64/SAU/2022      | HAdV/WW/K26-2B64/SAU/2022  | 0.02335258 |
| HAdV/St/AD5764/BRA/2001/41     | HAdV/WW/K23-2B64/SAU/2022  | 0.02336386 |
| HAdV/St/AD6026/BRA/2002/41     | HAdV/WW/K23-2B64/SAU/2022  | 0.02336386 |
| HAdV/St/AD4578/BRA/1999/41     | HAdV/WW/K23-2B64/SAU/2022  | 0.02336386 |
| HAdV/St/AD01-71218/BRA/2010/41 | HAdV/WW/K23-2B64/SAU/2022  | 0.02336386 |
| HAdV/St/AD102/BRA/2007/41      | HAdV/WW/K23-2B64/SAU/2022  | 0.02336386 |
| HAdV/St/AD454/BRA/2014/41      | HAdV/WW/K23-2B64/SAU/2022  | 0.02336386 |
| HAdV/WW/K19-2B64/SAU/2022      | HAdV/WW/K23-2B64/SAU/2022  | 0.02336386 |
| HAdV/Wt/WH2/SAU/2009/41        | HAdV/WW/K26-2B64/SAU/2022  | 0.02336403 |
| HAdV/Wt/WH2/SAU/2009/41        | HAdV/WW/10UA-2B64/SAU/2022 | 0.02336419 |



|                                |                            |            |
|--------------------------------|----------------------------|------------|
| HAdV/St/MU35/IRA/2016/41       | HAdV/WW/K26-2B64/SAU/2022  | 0.02336565 |
| HAdV/WW/BEL WW/UK/2022/41      | HAdV/WW/K26-2B64/SAU/2022  | 0.02336565 |
| HAdV/St/503030/IND/2009/41     | HAdV/WW/K26-2B64/SAU/2022  | 0.02336565 |
| HAdV/St/Tak/JAP/2008/41        | HAdV/WW/K26-2B64/SAU/2022  | 0.02336565 |
| HAdV/St/MU35/IRA/2016/41       | HAdV/WW/10UA-2B64/SAU/2022 | 0.02336591 |
| HAdV/WW/BEL WW/UK/2022/41      | HAdV/WW/10UA-2B64/SAU/2022 | 0.02336591 |
| HAdV/St/503030/IND/2009/41     | HAdV/WW/10UA-2B64/SAU/2022 | 0.02336591 |
| HAdV/St/Tak/JAP/2008/41        | HAdV/WW/10UA-2B64/SAU/2022 | 0.02336591 |
| HAdV/Wt/MN1/SAU/2009/41        | HAdV/WW/K20-2B64/SAU/2022  | 0.02336757 |
| HAdV/WW/LF2/SAU/2018/41        | HAdV/WW/K23-2B64/SAU/2022  | 0.02340039 |
| HAdV/Wt/WH1/SAU/2018/41        | HAdV/WW/K23-2B64/SAU/2022  | 0.02340039 |
| HAdV/WW/LMV WW/UK/2022/41      | HAdV/WW/K26-2B64/SAU/2022  | 0.02411588 |
| HAdV/WW/LMV WW/UK/2022/41      | HAdV/WW/10UA-2B64/SAU/2022 | 0.02411613 |
| HAdV/St/SA6749/SAF/2014/41     | HAdV/WW/K26-2B64/SAU/2022  | 0.02732286 |
| HAdV/St/SA6749/SAF/2014/41     | HAdV/WW/10UA-2B64/SAU/2022 | 0.02732314 |
| HAdV/Wt/MN1/SAU/2009/41        | HAdV/WW/K19-2B64/SAU/2022  | 0.02735614 |
| HAdV/WW/LF3/SAU/2018/41        | HAdV/WW/K23-2B64/SAU/2022  | 0.02738334 |
| HAdV/WW/LF5/SAU/2019/41        | HAdV/WW/K20-2B64/SAU/2022  | 0.03130515 |
| HAdV/St/AD99/BRA/2015/40       | HAdV/WW/10UA-2B64/SAU/2022 | 0.03132934 |
| HAdV/St/AD6353/BRA/2003/40     | HAdV/WW/10UA-2B64/SAU/2022 | 0.03132934 |
| HAdV/St/AD6048/BRA/2002/40     | HAdV/WW/10UA-2B64/SAU/2022 | 0.03132934 |
| HAdV/Wt/MN1/SAU/2009/41        | HAdV/WW/K26-2B64/SAU/2022  | 0.03132986 |
| HAdV/Wt/MN1/SAU/2009/41        | HAdV/WW/10UA-2B64/SAU/2022 | 0.03133039 |
| HAdV/St/HOUA-GOSH02/UK/2019/41 | HAdV/WW/K23-2B64/SAU/2022  | 0.03133625 |
| HAdV/St/GyK253/SWD/2014/41     | HAdV/WW/K23-2B64/SAU/2022  | 0.03133625 |
| HAdV/St/RVAB/BLG/2011/41       | HAdV/WW/K23-2B64/SAU/2022  | 0.03133625 |
| HAdV/St/F1907/CHN/2019/41      | HAdV/WW/K23-2B64/SAU/2022  | 0.03133625 |
| HAdV/WW/HS12/USA/2009/41       | HAdV/WW/K23-2B64/SAU/2022  | 0.03133625 |
| HAdV/St/503214/IND/2009/41     | HAdV/WW/K23-2B64/SAU/2022  | 0.03133625 |
| HAdV/St/MU35/IRA/2016/41       | HAdV/WW/K23-2B64/SAU/2022  | 0.03532177 |
| HAdV/WW/BEL WW/UK/2022/41      | HAdV/WW/K23-2B64/SAU/2022  | 0.03532177 |
| HAdV/St/503030/IND/2009/41     | HAdV/WW/K23-2B64/SAU/2022  | 0.03532177 |
| HAdV/St/Tak/JAP/2008/41        | HAdV/WW/K23-2B64/SAU/2022  | 0.03532177 |
| HAdV/WW/LF5/SAU/2019/41        | HAdV/WW/K19-2B64/SAU/2022  | 0.03532485 |
| HAdV/Wt/WH2/SAU/2009/41        | HAdV/WW/K23-2B64/SAU/2022  | 0.03542307 |
| HAdV/WW/LMV WW/UK/2022/41      | HAdV/WW/K23-2B64/SAU/2022  | 0.03646523 |
| HAdV/WW/LF5/SAU/2019/41        | HAdV/WW/K26-2B64/SAU/2022  | 0.03934659 |
| HAdV/WW/LF5/SAU/2019/41        | HAdV/WW/10UA-2B64/SAU/2022 | 0.03934718 |
| HAdV/St/SA6749/SAF/2014/41     | HAdV/WW/K23-2B64/SAU/2022  | 0.03936000 |
| HAdV/St/AD99/BRA/2015/40       | HAdV/WW/K20-2B64/SAU/2022  | 0.03938173 |
| HAdV/St/AD6353/BRA/2003/40     | HAdV/WW/K20-2B64/SAU/2022  | 0.03938173 |
| HAdV/St/AD6048/BRA/2002/40     | HAdV/WW/K20-2B64/SAU/2022  | 0.03938173 |
| HAdV/Wt/MN1/SAU/2009/41        | HAdV/WW/K23-2B64/SAU/2022  | 0.04339944 |
| HAdV/St/AD99/BRA/2015/40       | HAdV/WW/K19-2B64/SAU/2022  | 0.04346988 |
| HAdV/St/AD6353/BRA/2003/40     | HAdV/WW/K19-2B64/SAU/2022  | 0.04346988 |
| HAdV/St/AD6048/BRA/2002/40     | HAdV/WW/K19-2B64/SAU/2022  | 0.04346988 |
| HAdV/St/AD99/BRA/2015/40       | HAdV/WW/K26-2B64/SAU/2022  | 0.04752511 |
| HAdV/St/AD6353/BRA/2003/40     | HAdV/WW/K26-2B64/SAU/2022  | 0.04752511 |



|                             |                            |            |
|-----------------------------|----------------------------|------------|
| HAdV/St/AD6048/BRA/2002/40  | HAdV/WW/K26-2B64/SAU/2022  | 0.04752511 |
| HAdV/St/AD99/BRA/2015/40    | HAdV/WW/K23-2B64/SAU/2022  | 0.05157309 |
| HAdV/St/AD6353/BRA/2003/40  | HAdV/WW/K23-2B64/SAU/2022  | 0.05157309 |
| HAdV/St/AD6048/BRA/2002/40  | HAdV/WW/K23-2B64/SAU/2022  | 0.05157309 |
| HAdV/WW/LF5/SAU/2019/41     | HAdV/WW/K23-2B64/SAU/2022  | 0.05158217 |
| HAdV/St/Leipzig/GER/2004/74 | HAdV/WW/10UA-2B64/SAU/2022 | 0.13512609 |
| HAdV/St/Leipzig/GER/2004/74 | HAdV/WW/K20-2B64/SAU/2022  | 0.14450114 |
| HAdV/St/Leipzig/GER/2004/74 | HAdV/WW/K19-2B64/SAU/2022  | 0.14936679 |
| HAdV/St/Leipzig/GER/2004/74 | HAdV/WW/K26-2B64/SAU/2022  | 0.15398542 |
| HAdV/St/Leipzig/GER/2004/74 | HAdV/WW/K23-2B64/SAU/2022  | 0.15839913 |

The table comprised only sequences having a divergence distance ( $d$ ) of up to 0.15839913 to our HAdV sequences. Null distances were displayed in red. Moreover, sequences belonging to other isolates and of zero-distance to our isolates were shown in bold and clustered.

Table S4. Full description of sequences used for phylogenetic analysis of human adenovirus isolates.

| Accession number | Source               | Isolate                              | Nomination                     | Country        | Type | Year      |
|------------------|----------------------|--------------------------------------|--------------------------------|----------------|------|-----------|
| MW088432         | Stool                | IAL-AD6026                           | HAdV/St/AD6026/BRA/2002/41     | Brazil         | 41   | 2002      |
| MW088401         | Stool                | IAL-AD4578                           | HAdV/St/AD4578/BRA/1999/41     | Brazil         | 41   | 1999      |
| MT341445         | Stool                | IAL-AD01-71218                       | HAdV/St/AD01-71218/BRA/2010/41 | Brazil         | 41   | 2010      |
| MT341369         | Stool                | IAL-AD102                            | HAdV/St/AD102/BRA/2007/41      | Brazil         | 41   | 2007      |
| MH223623         | Stool                | IAL-AD178                            | HAdV/St/AD178/BRA/2016/41      | Brazil         | 41   | 2016      |
| MH201101         | Stool                | IAL-AD55                             | HAdV/St/AD55/BRA/2015/41       | Brazil         | 41   | 2015      |
| MH152672         | Stool                | IAL-AD1347                           | HAdV/St/AD1347/BRA/2012/41     | Brazil         | 41   | 2012      |
| MW088491         | Stool                | IAL-AD8244                           | HAdV/St/AD8244/BRA/2004/41     | Brazil         | 41   | 2004      |
| MW088442         | Stool                | IAL-AD8561                           | HAdV/St/AD8561/BRA/2005/41     | Brazil         | 41   | 2005      |
| MW088438         | Stool                | IAL-AD6301                           | HAdV/St/AD6301/BRA/2003/41     | Brazil         | 41   | 2003      |
| MH168367         | Stool                | IAL-AD454                            | HAdV/St/AD454/BRA/2014/41      | Brazil         | 41   | 2014      |
| MG925783         | Stool                | MU35                                 | HAdV/St/MU35/IRA/2016/41       | Iraq           | 41   | 2016      |
| ON923977         | Wastewater           | BEL_WW                               | HAdV/WW/BEL_WW/UK/2022/41      | United Kingdom | 41   | 2022      |
| MK962807         | Stool                | SA6749                               | HAdV/St/SA6749/SAF/2014/41     | South Africa   | 41   | 2009/2014 |
| KX868523         | Stool                | GyK253                               | HAdV/St/GyK253/SWD/2014/41     | Sweden         | 41   | 2000      |
| MZ603083         | Stool                | HAdV-41 RVAB                         | HAdV/St/RVAB/BLG/2011/41       | Belgium        | 41   | 2011      |
| MT150513         | Stool                | F1907/Beijing/07/2019                | HAdV/St/F1907/CHN/2019/41      | China          | 41   | 2019      |
| JF699082         | Raw sewage           | HS12                                 | HAdV/WW/HS12/USA/2009/41       | USA            | 41   | 2009      |
| HQ005289         | Stool                | 503214/KOL/2009                      | HAdV/St/503214/IND/2009/41     | India          | 41   | 2009      |
| MW936370         | water                | WH2_HAdV_2018                        | HAdV/Wt/WH2/SAU/2009/41        | Saudi Arabia   | 41   | 2021      |
| HQ005282         | Stool                | 503030/KOL/2009                      | HAdV/St/503030/IND/2009/41     | India          | 41   | 2009      |
| AB330122         | Stool                | Tak                                  | HAdV/St/Tak/JAP/2008/41        | Japan          | 41   | 2008      |
| MW936376         | water                | MN1_HAdV_2018                        | HAdV/Wt/MN1/SAU/2009/41        | Saudi Arabia   | 41   | 2018      |
| MH201117         | Stool                | IAL-AD99/15                          | HAdV/St/AD99/BRA/2015/40       | Brazil         | 40   | 2015      |
| MW088378         | Stool                | IAL-AD6353                           | HAdV/St/AD6353/BRA/2003/40     | Brazil         | 40   | 2003      |
| MW088370         | Stool                | IAL-AD6048                           | HAdV/St/AD6048/BRA/2002/40     | Brazil         | 40   | 2002      |
| KY618677         | Stool                | human/DEU/Leipzig/2015/74[P70H74F51] | HAdV/St/Leipzig/GER/2004/74    | Germany        | 74   | 2015      |
| MH251892         | Stool                | AD329                                | HAdV/St/AD329/BRA/2017/41      | Brazil         | 41   | 2017      |
| MH201097         | Stool                | AD11                                 | HAdV/St/AD11/BRA/2015/41       | Brazil         | 41   | 2015      |
| MW088519         | Stool                | AD8325                               | HAdV/St/AD8325/BRA/2004/41     | Brazil         | 41   | 2004      |
| MW936375         | Irrigation water     | IW                                   | HAdV/Wt/IW/SAU/2018/41         | Saudi Arabia   | 41   | 2018      |
| MW936378         | Landfill wastewater  | LF2                                  | HAdV/WW/LF2/SAU/2018/41        | Saudi Arabia   | 41   | 2018      |
| MW936369         | Surface water (Lake) | WH1                                  | HAdV/Wt/WH1/SAU/2018/41        | Saudi Arabia   | 41   | 2018      |
| MW936379         | Landfill wastewater  | LF3                                  | HAdV/WW/LF3/SAU/2018/41        | Saudi Arabia   | 41   | 2018      |
| MW936381         | Landfill wastewater  | LF5                                  | HAdV/WW/LF5/SAU/2019/41        | Saudi Arabia   | 41   | 2019      |
| ON923973         | Wastewater           | LMV_WW                               | HAdV/WW/LMV_WW/UK/2022/41      | United Kingdom | 41   | 2022      |
| OP174922         | Stool                | HOUA-GOSH02                          | HAdV/St/HOUA-GOSH02/UK/2019/41 | United Kingdom | 41   | 2019      |
| MW088429         | stool                | IAL-AD5764                           | HAdV/St/AD5764/BRA/2001/41     | Brazil         | 41   | 2001      |
